# Supplementary material for: VEGF-A-Cleavage by FSAP and Inhibition of Neo-Vascularization
Source: PubMed Central journal article supplement (PMC6912458; doi:10.3390/cells8111396), 2019-11-06
Supplement: cells-08-01396-s001.pdf [file cells-08-01396-s001.pdf]

# Supplementary Fig. S1

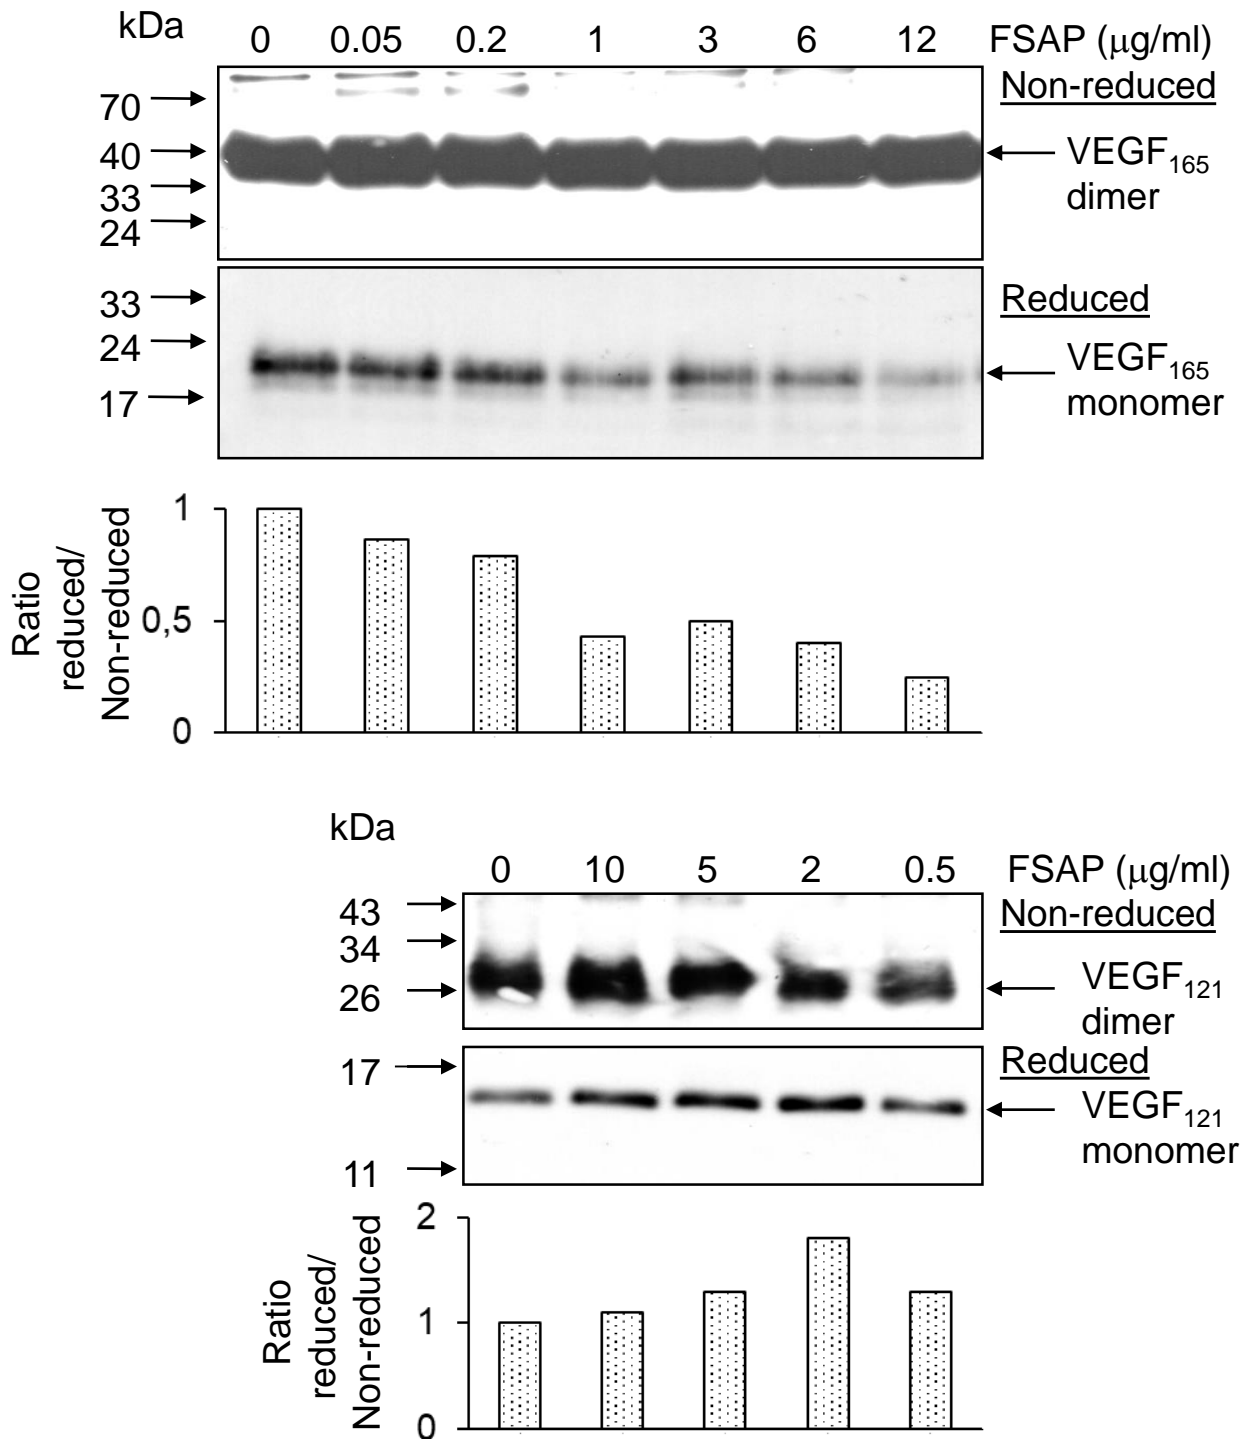

Cleavage of VEGF<sub>165</sub> and VEGF<sub>121</sub> by FSAP: Mixtures of FSAP (0-12 µg/ml) and VEGF<sub>165</sub> (top panels) or VEGF<sub>121</sub> (bottom panels) (1 µg/ml) were incubated for 1 h at 37°C and Western blotting was performed with an anti-VEGF antibody under non-reducing or reducing conditions. Ratio of reduced to non-reduced VEGF after densitometric analysis is presented in the bar charts.

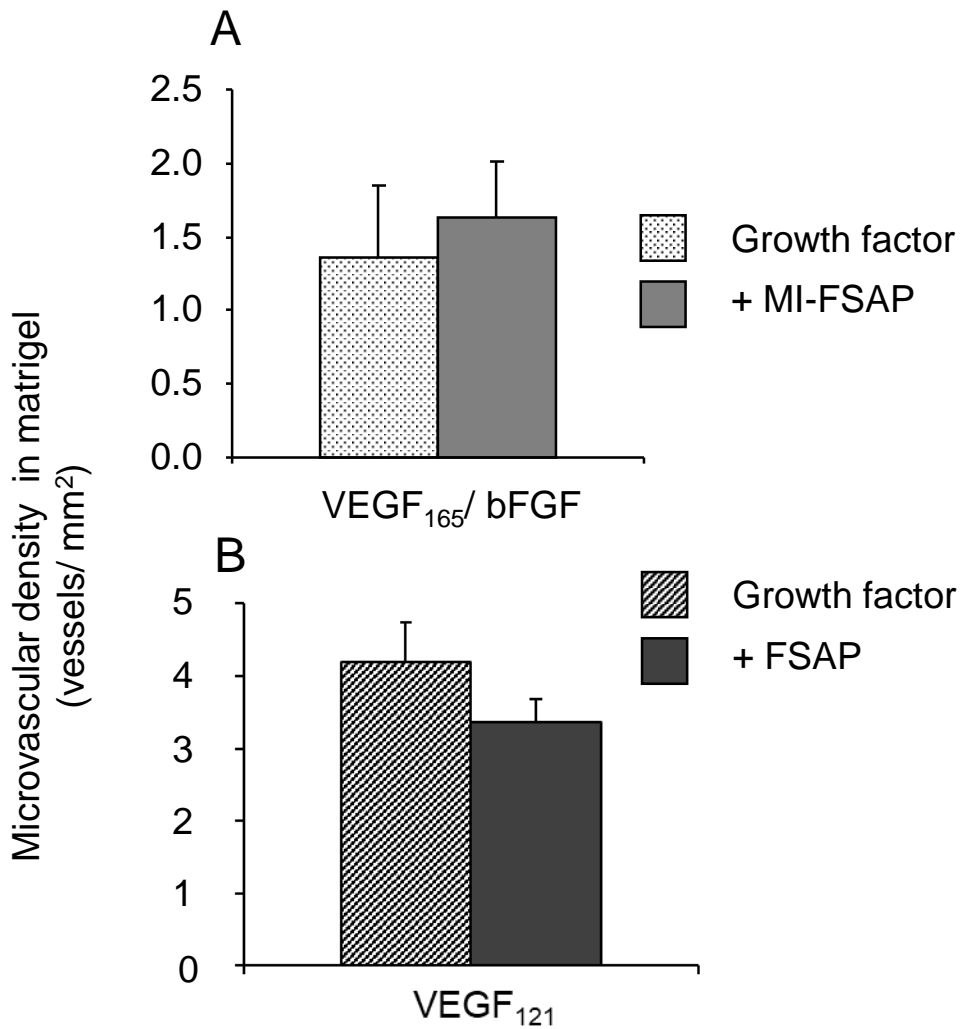

Microvascular density in matrigel plugs: A) Effect of MI-FSAP. Matrigel was supplemented with heparin (200  $\mu\text{g/ml}$ ) and either buffer or MI-FSAP (G534E- SNP) (12  $\mu\text{g/ml}$ ) as well as VEGF<sub>165</sub> and bFGF (200 ng/ml each) and applied subcutaneously into mice. After 7 days the plugs were removed, fixed and quantitative analysis of microvascular density was performed (n= 3 mice; mean  $\pm$  SEM). B) Same as above except that VEGF<sub>121</sub> and FSAP was tested (n= 3 mice; mean  $\pm$  SEM).

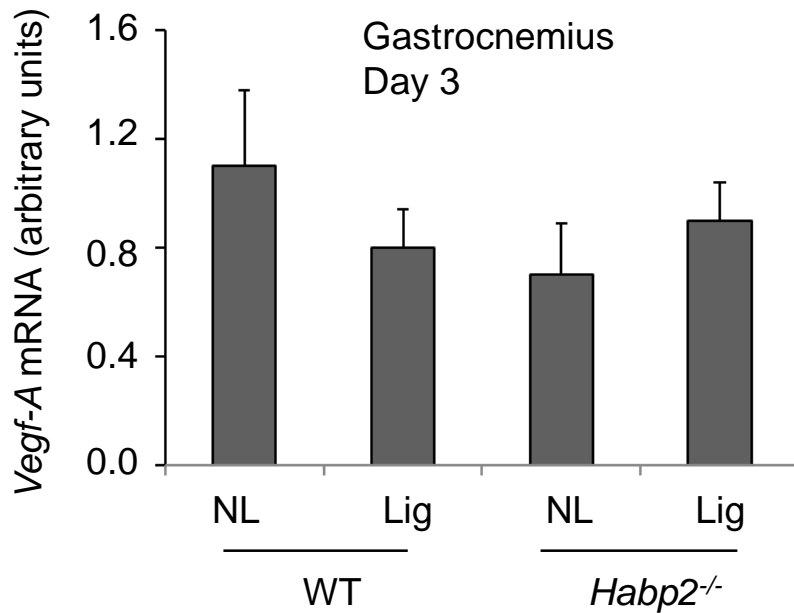

Vegf-A mRNA levels in the hind limb ischemia model: *Vegf-A mRNA* was analyzed from femoral arteries with ligation (Lig) or non-ligated (NL) at day 3 in the gastrocnemius muscle. mRNA levels are shown, relative to *Gapdh*, as fold increase over non-ligated WT mice, mean  $\pm$  SEM, n=4. Real-time quantitative PCR analysis was done as described in references 15 and 16 of the main manuscript.
